# Supplementary material
Source: publisher figshare collection journal article supplement (https://acs.figshare.com/ndownloader/files/3939307)
Supplement: Supplementary file 1 [file 3939307]

## Sheet: TableS3
Table S3. Motifs identified by Motif-X using the whole Phaeodactylum tricornutum proteome as background dataset.
Accession	Description	Best hit from JGI	Extract Sequence (13 aa)	Motif Pattern
10701	Unknown	Nitrate transporter	EVSAAASFRSGAL	......S..S...
13135	Hypothetical protein	Ammonium transporter AMT2a	GSAYDLSGPSKDH	......S..S...
13724	U5 small nuclear ribonucleoprotein 200 KDa helicase-like	PREDICTED: similar to pre-mrna-splicing helicase BRR2	SVAAAESDESEED	......S..S...		#	Motif	Motif	Foreground	Foreground	Background	Background	Fold
14548	Small Rab-related gtpase	GTP-binding protein	DTAGQESFRSITR	......S..S...				Score	Matches	Size	Matches	Size	Increase
17281	Adenosine 3 -phospho 5 -phosphosulfate transporter 1-like	Unknown	SQRDVASGNSQSP	......S..S...		1	......S..S...	9.77	59	271	2315	25733	2.42
18005	Nucleolar gtp-binding protein 2	Nucleolar GTP-binding protein	AKTGWKSGISNTS	......S..S...		2	...S..S......	6.18	42	212	2075	23418	2.24
			GWKSGISNTSSAG	......S..S...
18839	Anion exchange family protein	Boron transporter	HRTRNDSFDSEEL	......S..S...
19589	3-ketoacyl- synthase	Condensing enzyme	GMRRVDSEASDMS	......S..S...
			RVDSEASDMSELG	......S..S...
20567	UDP-n-acetylglucosamine transporter	Nucleotide-sugar transporter	MVERQESSQSGGV	......S..S...
22092	Proliferation-associated metalloprotease family	Putative DNA-binding protein GBP16	ELSDAESVGSEAE	......S..S...
22923	Kinesin family-like protein	Hypothetical protein	AAKKVRSQSSASA	......S..S...
24266	Hypothetical protein	Hypothetical protein	FGKAPSSGNSFGS	......S..S...
31426	Part of actin cytoskeleton-regulatory complex pan1p-sla1p-end3p	Hypothetical protein	VLKTVASNDSEYG	......S..S...
31677	Small RNA degrading nuclease 5-like	PREDICTED ribonuclease H70	ATSEIDSAESLRS	......S..S...
31814	Zip family transporter: zinc ion	Predicted divalent heavy-metal cations transporter	DDGTDDSEVSVNK	......S..S...
31911	Hypothetical protein	Heat shock factor protein 1 (HSF 1)	GLSRGASIESSAS	......S..S...
			RGASIESSASAVL	......S..S...
32105	Hsp90-like protein	Hypothetical protein	AKAFSSSGGSFLY	......S..S...
32134	Hypothetical protein	Viral A-type inclusion protein repeat, putative	QKSPANSETSETD	......S..S...
32172	Snf1-related protein kinase catalytic subunit alpha kin10	AKIN10, protein kinase	NPSRGLSDASMDV	......S..S...
32269	Transferring glycosyl	1,3-beta-glucan synthase/transferase, transferring glycosyl groups	RVRRVVSAGSLSS	......S..S...
			RVVSAGSLSSLDA	......S..S...
32392	Hypothetical protein	Hypothetical protein	KRGGDESESSDLP	......S..S...
33001	Hypothetical protein	Unknown	GTDRSSSGGSVGL	......S..S...
33038	Nuclear pore complex	Proteophosphoglycan 5	KTDNSKSRDSPAI	......S..S...
33148	Perq amino acid-rich with gyf domain-containing protein 2 isoform b	Unknown	ERSRSQSVGSENG	......S..S...
33341	Unknown	Hypothetical protein	RSVGERSIGSIGQ	......S..S...
33716	Hypothetical protein	Hypothetical protein	GLKRSLSQDSSGS	......S..S...
			RSLSQDSSGSLAV	......S..S...
34258	ATP-binding cassette superfamily	ATP-binding cassette transporter G1 variant V	NPRRLHSAQSSGM	......S..S...
34342	Unknown	Hyphally-regulated protein precursor	LTAPFPSTGSVTT	......S..S...
34362	Hypothetical protein	PREDICTED:similar to Early endosome antigen 1	IALQEESDMSGSK	......S..S...
35017	Unknown	Unknown	GNRLVLSKSSRNG	......S..S...
35818	Methylated-dna--protein-cysteine methyltransferase	Hypothetical protein	CHRVVQSDLSLGG	......S..S...
36097	Hypothetical protein	Hypothetical protein	KWNASGSFGSLLM	......S..S...
36351	Hypothetical protein	Dentin sialophosphoprotein	SRDASTSIRSTKE	......S..S...
36463	Sec7-like guanine nucleotide exchange family protein	Hypothetical protein	DDRDISSVPSTGQ	......S..S...
36467	Unknown	Hypothetical protein	TVNRFASDNSLSI	......S..S...
36501	Unknown	Predicted ester cyclase	AADENGSRSSTEF	......S..S...
36694	Unknown	Hypothetical protein	VDIDDQSIASTAE	......S..S...
36704	Hypothetical protein	Protein kinase domain containing protein	ITSSISSVDSRFT	......S..S...
			NSLITSSISSVDS	......S..S...
37279	Class VII unconventional myosin	Class VII unconventional myosin	GAEGWKSIFSNVM	......S..S...
37348	Hypothetical protein	Ankyrin repeat protein family	LASHRRSRSSGTL	......S..S...
37682	Unknown	Argonaut-like protein	PAVRSPSTLSQED	......S..S...
37839	Unknown	Hypothetical protein	RKEQRLSQLSPLL	......S..S...
37928	Hypothetical protein	Hedgehog protein	GGVGDASVVSSAG	......S..S...
38611	Phospholipid-transporting atpase	Putative E1-E2 ATPase	NRARTVSVNSIPE	......S..S...
38918	Abnormal spindle-like microcephaly-associated protein homolog	Abnormal spindle	FGTIMPSKTSIRS	......S..S...
39617	L-lactate permease	L-lactate permease	EDIGSVSENSLVR	......S..S...
			VRKYQKSASSLSD	......S..S...
40688	Small gtpase	Rab GTPase activating protein	STPQRQSQASPPT	......S..S...
40903	Unknown	Homeotic protein female sterile (Fragile-chorion membrane protein)	GHRWGDSDSSDED	......S..S...
41009	Unknown	Unknown	VMSRRNSAESSSS	......S..S...
41424	Unknown	Unknown	TDGRRLSMPSATD	......S..S...
52624	Unknown	Unknown	SASSPVSVRSVPT	......S..S...
bd_1415	Unknown	Unknown	GAGRSSSGNSDGG	......S..S...
14487	Glyceraldehyde-3-phosphate dehydrogenase	Glyceraldehyde-3-phosphate dehydrogenase precursor	ALKSSASNDASMS	...S..S......
17337	Hypothetical protein	ATP binding/kinase/protein kinase/protein serine/threonine kinase/protein-tyrosine kinase	QAFSGESLDKATA	...S..S......
17746	Subunit of the ccr4not complex	NOT2/NOT3/NOT5 family protein	SATSSKSVDGPVP	...S..S......
18005	Nucleolar gtp-binding protein 2	Nucleolar GTP-binding protein	SGISNTSSAGKTN	...S..S......
18839	Anion exchange family protein	Boron transporter	RNDSFDSEELNFP	...S..S......
20567	UDP-n-acetylglucosamine transporter	Nucleotide-sugar transporter	RQESSQSGGVLEI	...S..S......
31426	Part of actin cytoskeleton-regulatory complex pan1p-sla1p-end3p	Hypothetical protein	TVASNDSEYGQLK	...S..S......
31814	Zip family transporter: zinc ion	Predicted divalent heavy-metal cations transporter	TDDSEVSVNKLDK	...S..S......
32105	Hsp90-like protein	Hypothetical protein	FSSSGGSFLYVDK	...S..S......
32172	Snf1-related protein kinase catalytic subunit alpha kin10	AKIN10, protein kinase	RGLSDASMDVDID	...S..S......
32360	Bromodomain-containing protein 9	Unknown	TSTSSSSPAGGVV	...S..S......
32392	Hypothetical protein	Hypothetical protein	GDESESSDLPGPV	...S..S......
33001	Hypothetical protein	Unknown	RSSSGGSVGLIQL	...S..S......
33038	Nuclear pore complex	Proteophosphoglycan 5	NSKSRDSPAISRS	...S..S......
33148	Perq amino acid-rich with gyf domain-containing protein 2 isoform b	Unknown	RSQSVGSENGPVV	...S..S......
33341	Unknown	Hypothetical protein	GERSIGSIGQVAG	...S..S......
33454	Unknown	Unknown	HRLSVDSEAVTHK	...S..S......
33716	Hypothetical protein	Hypothetical protein	SQDSSGSLAVLSL	...S..S......
34258	ATP-binding cassette superfamily	ATP-binding cassette transporter G1 variant V	RLHSAQSSGMESS	...S..S......
35818	Methylated-dna--protein-cysteine methyltransferase	Hypothetical protein	VVQSDLSLGGFGG	...S..S......
36072	Unknown	Unknown	PPPSPTSSRMFPF	...S..S......
36097	Hypothetical protein	Hypothetical protein	ASGSFGSLLMQLQ	...S..S......
36467	Unknown	Hypothetical protein	RFASDNSLSIAEL	...S..S......
36501	Unknown	Predicted ester cyclase	ENGSRSSTEFAEA	...S..S......
36552	Unknown	Dentin sialophosphoprotein precursor	SCLSERSPVLEAG	...S..S......
36738	Unknown	Hypothetical protein	TAASLGSGRDSRW	...S..S......
37296	Unknown	Similar to cell surface flocculin	RKASSDSFLALLE	...S..S......
37348	Hypothetical protein	Ankyrin repeat protein family	HRRSRSSGTLEDI	...S..S......
37465	Pseudouridylate synthase 7 homolog	PREDICTED: similar to mKIAA1897 protein	LKSSGISIGRVHK	...S..S......
37682	Unknown	Argonaut-like protein	RSPSTLSQEDAEL	...S..S......
37797	Unknown	Hypothetical protein	VDLSNKSDLAVLN	...S..S......
37839	Unknown	Hypothetical protein	LLGSSLSDMKNLD	...S..S......
37928	Hypothetical protein	Hedgehog protein	GDASVVSSAGGTL	...S..S......
38611	Phospholipid-transporting atpase	Putative E1-E2 ATPase	RTVSVNSIPEDRN	...S..S......
39617	L-lactate permease	L-lactate permease	KSASSLSDVPESG	...S..S......
			GSVSENSLVRKYQ	...S..S......
40642	Unknown	LHY-like protein	RSSSSASLDTAPV	...S..S......
			SKRSSSSASLDTA	...S..S......
40688	Small gtpase	Rab GTPase activating protein	QRQSQASPPTLES	...S..S......
41442	Unknown	Adenylyl cyclase	SGLSRISDADISI	...S..S......
			SIFSDLSRKIGNV	...S..S......
42716	Elongation factor ts	Elongation factor Ts (EF-Ts)	ASFSMESLKDLRV	...S..S......
